# Supplementary material
Source: ML conference proceedings conference paper supplement (https://openreview.net/forum?id=TETmEkko7e5)
Supplement: supplementary_material [file attachment]

## Sheet: sokoban_study_data
age	ai_knowledge	education	exp_additional_info	exp_rating	Sokoban environment	gender	plan_knowledge	planning_formalisms	selected_exp
26	yes	masters	As someone who has studied AI, I would have specified the successor functions and path costs associated with each state transition since this is a planning problem. It would have been easier to understand the role of grabbing the butterfly on the cost of the steps taken.	3	sokoban-swtich	male	yes	Simple reflex, utility based (min-max, alpha beta, etc), learning agent based (reinforcement learning, supervised and unsupervised), and so on...	concept_exp
23	no	masters		2	sokoban-swtich	male	no		concept_exp
21	yes	undergrad		1	sokoban-swtich	female	no		concept_exp
		undergrad		3	sokoban-swtich	do_not_specify			concept_exp
22	no	undergrad		3	sokoban-swtich	male	no		concept_exp
26	no	masters		4	sokoban-swtich	male	no		simple_exp
25	no	masters		2	sokoban-swtich	male	no		simple_exp
30	yes	masters		3	sokoban-swtich	male	no	NA	concept_exp
22	yes	masters	The cost of the steps taken to move to the right and activate the butterfly box.	3	sokoban-swtich	female	yes	Planning STRIPS/PDDL representation progression, regression, plan-space planning; subgoal interactions, heuristics	concept_exp
24	yes	masters		4	sokoban-swtich	male	yes	MDPs, PoMDPs	concept_exp
23	yes	undergrad	The first explanation made more sense to me as it provided the cost function evaluation for each and every step.	4	sokoban-cell	female	yes	STRIPS	simple_exp
23	no	masters	No	5	sokoban-cell	female	no		concept_exp
26	no	undergrad		5	sokoban-cell	male	no		concept_exp
22	yes	masters		5	sokoban-cell	male	yes	PDDL	simple_exp
22	yes	undergrad		4	sokoban-cell	male	yes	BFS, DFS, A*, D*lite	concept_exp
22	yes	undergrad		2	sokoban-cell	male	no		concept_exp
26	no	undergrad		4	sokoban-cell	male	no		simple_exp
27	no	masters	We needed more information on how was the initial path cost was calculated. We need to have information about cost calculation for both the paths to know which path is most effective.	3	sokoban-cell	female	no	I have read about some path planning algorithms for robot path planning like A-STAR,D-STAR, RRT-STAR.	concept_exp
23	no	undergrad		4	sokoban-cell	male	no		concept_exp
26	yes	masters		3	sokoban-cell	male	yes	Backward chaining search, forward chaining state space search	simple_exp
